# Supplementary material for: Transcriptomic Analysis of Octanoic Acid Response in Drosophila sechellia Using RNA-Sequencing
Source: PubMed Central journal article supplement (PMC5714484; doi:10.1534/g3.117.300297), 2017-10-11
Supplement: 3867FileS1.pdf [file 3867FileS1.pdf]

## Supplementary Information

### Supplemental Figure

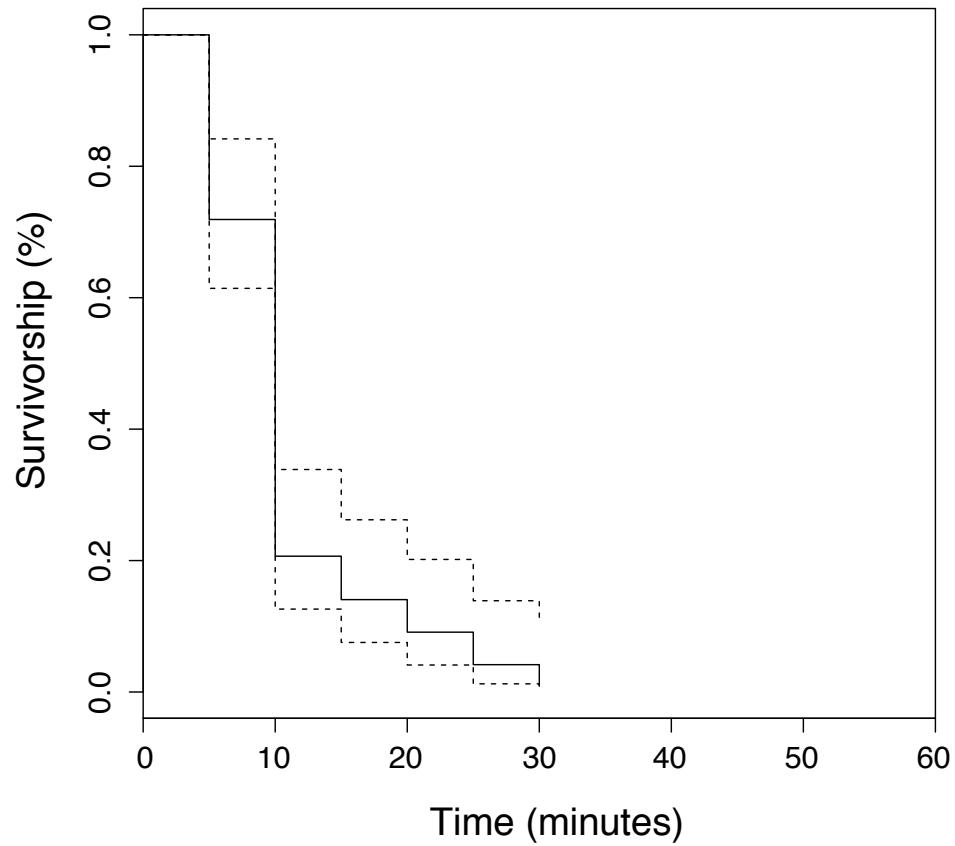

**Supplemental Figure 1.** The survival curve from an octanoic acid (OA) resistance assay is shown for *D. simulans* at a concentration of 0.7% OA. All flies assayed were knocked down within 30 minutes ( $n = 60$ ). Dotted lines represent 95% confidence intervals from a Cox regression model (Cox 1972; Fox 2008).

## Supplementary Tables

Supplementary Table 1. List of significantly differentially expressed genes upon exposure to 0.7% OA in *D. sechellia*.

| <i>D. sechellia</i> gene | <i>D. melanogaster</i> ortholog | Expression in control (FPKM) | Expression in OA (FPKM) | qvalue     |
|--------------------------|---------------------------------|------------------------------|-------------------------|------------|
| GM21567                  | <i>AttA</i>                     | 299.311                      | 16.8494                 | 0.00369591 |
| GM21465                  | <i>AttC</i>                     | 619.82                       | 166.673                 | 0.00369591 |
| GM10533                  | <i>Ccp84Ac</i>                  | 0                            | 2.68372                 | 0.00369591 |
| GM10910                  | <i>Ccp84Ag</i>                  | 0                            | 3.08253                 | 0.00369591 |
| CecA1                    | <i>CecA2</i>                    | 872.378                      | 80.2675                 | 0.00369591 |
| CecB                     | <i>CecB</i>                     | 22.8332                      | 0                       | 0.0237434  |
| GM10577                  | <i>CG10280</i>                  | 14.9944                      | 5.26221                 | 0.03358    |
| GM25738                  | <i>CG10407</i>                  | 151.323                      | 53.6545                 | 0.00369591 |
| GM13909                  | <i>CG10592</i>                  | 160.741                      | 77.6551                 | 0.00369591 |
| GM20285                  | <i>CG10814</i>                  | 315.069                      | 123.951                 | 0.00369591 |
| GM22074                  | <i>CG11137</i>                  | 189.784                      | 104.766                 | 0.0209875  |
| GM22449                  | <i>CG11425</i>                  | 147.489                      | 61.1621                 | 0.00369591 |
| GM24424                  | <i>CG13047</i>                  | 0                            | 2.23475                 | 0.00369591 |
| GM17353                  | <i>CG13083</i>                  | 45.2505                      | 15.3457                 | 0.00369591 |
| GM17352                  | <i>CG13084</i>                  | 40.2714                      | 14.2391                 | 0.00369591 |
| GM21372                  | <i>CG13159</i>                  | 0                            | 53.7365                 | 0.00369591 |
| GM13860                  | <i>CG13297</i>                  | 0                            | 5.75263                 | 0.00369591 |
| GM17654                  | <i>CG1368</i>                   | 6.80424                      | 26.6561                 | 0.00369591 |
| GM21466                  | <i>CG13749</i>                  | 636.484                      | 296.919                 | 0.00974006 |
| GM25236                  | <i>CG14147</i>                  | 0                            | 4.99158                 | 0.00369591 |
| GM22251                  | <i>CG14187</i>                  | 82.0007                      | 11.5423                 | 0.00369591 |
| GM17502                  | <i>CG14427</i>                  | 6.27396                      | 0                       | 0.00369591 |
| GM21046                  | <i>CG14752</i>                  | 0                            | 5.35846                 | 0.00369591 |
| GM20710                  | <i>CG14756</i>                  | 0                            | 6.23812                 | 0.00369591 |
| GM18840                  | <i>CG14915</i>                  | 40.3444                      | 0                       | 0.00369591 |
| GM13975                  | <i>CG15022</i>                  | 0                            | 5.86608                 | 0.00369591 |
| GM13933                  | <i>CG15213</i>                  | 0                            | 34.7585                 | 0.0067546  |
| GM13042                  | <i>CG15740</i>                  | 0                            | 5.15401                 | 0.00369591 |
| GM13954                  | <i>CG15876</i>                  | 6.50185                      | 0                       | 0.00369591 |
| GM14119                  | <i>CG16762</i>                  | 15.5898                      | 42.1094                 | 0.00974006 |
| GM10290                  | <i>CG16815</i>                  | 2.89327                      | 0                       | 0.00369591 |
| GM25218                  | <i>CG18628</i>                  | 1142.77                      | 562.283                 | 0.00974006 |
| GM26154                  | <i>CG31272</i>                  | 25.4191                      | 10.2968                 | 0.0067546  |
| GM15146                  | <i>CG31813</i>                  | 0                            | 17.9298                 | 0.00369591 |

|         |                         |          |         |            |
|---------|-------------------------|----------|---------|------------|
| GM22817 | <i>CG32548</i>          | 0        | 2.02356 | 0.00369591 |
| GM14261 | <i>CG3344</i>           | 96.06    | 56.7078 | 0.0315324  |
| GM10110 | <i>CG3348</i>           | 342.864  | 125.23  | 0.00369591 |
| GM14909 | <i>CG3819</i>           | 186.139  | 81.2924 | 0.00369591 |
| GM18851 | <i>CG43725</i>          | 62.5214  | 0       | 0.00369591 |
| GM15682 | <i>CG4377</i>           | 134.475  | 70.5272 | 0.0181747  |
| GM17242 | <i>CG5110</i>           | 114.28   | 241.177 | 0.00974006 |
| GM14710 | <i>CG5150</i>           | 149.74   | 66.5612 | 0.00369591 |
| GM26400 | <i>CG5791</i>           | 483.113  | 141.666 | 0.00369591 |
| GM14989 | <i>CG6885</i>           | 4.24459  | 0       | 0.00369591 |
| GM14968 | <i>CG7330</i>           | 0        | 2.25015 | 0.0067546  |
| GM25710 | <i>CG7542</i>           | 265.502  | 126.106 | 0.00369591 |
| GM14841 | <i>CG8562</i>           | 277.117  | 159.967 | 0.03358    |
| GM14222 | <i>CG9184</i>           | 0        | 28.1869 | 0.00369591 |
| GM13371 | <i>CG9672</i>           | 49.1188  | 21.1608 | 0.03358    |
| GM25877 | <i>CG9928</i>           | 1196.81  | 3129.7  | 0.00369591 |
| GM11401 | <i>Cht6</i>             | 0.866183 | 1.87078 | 0.0409988  |
| GM15753 | <i>Cht9</i>             | 57.1731  | 23.8922 | 0.00369591 |
| GM25088 | <i>Cp16</i>             | 390.056  | 37.6552 | 0.00369591 |
| GM25085 | <i>Cp18</i>             | 266.148  | 18.9007 | 0.00369591 |
| GM25087 | <i>Cp19</i>             | 925.42   | 157.152 | 0.00369591 |
| GM13998 | <i>Cpr64Ab</i>          | 0        | 3.03669 | 0.0126376  |
| GM20557 | <i>Def</i>              | 3106.25  | 889.394 | 0.00369591 |
| GM21924 | <i>DptB</i>             | 797.405  | 101.994 | 0.00369591 |
| GM21566 | <i>Dro</i>              | 9308.67  | 2612.53 | 0.00369591 |
| GM14569 | <i>Drs</i>              | 4226.32  | 1199.36 | 0.00369591 |
| GM14560 | <i>Drsl2</i>            | 15.1553  | 0       | 0.0126376  |
| GM14562 | <i>Drsl5</i>            | 2069.11  | 987.333 | 0.0067546  |
| GM16160 | <i>dunk</i>             | 18.5463  | 1.11548 | 0.0181747  |
| GM13693 | <i>e(r)</i>             | 257.404  | 489.369 | 0.0388071  |
| GM10294 | <i>E(spl)mgamma-HLH</i> | 0        | 3.49195 | 0.00369591 |
| GM25706 | <i>edin</i>             | 301.734  | 35.7687 | 0.00369591 |
| GM18842 | <i>Fcp3C</i>            | 146.006  | 22.6801 | 0.00369591 |
| GM12699 | <i>Femcoat</i>          | 45.5622  | 6.85704 | 0.00369591 |
| GM22021 | <i>GNBP-like3</i>       | 518.503  | 15.923  | 0.00369591 |
| GM24056 | <i>Gnmt</i>             | 73.1719  | 31.5435 | 0.00369591 |
| GM15526 | <i>IM18</i>             | 3455.31  | 399.252 | 0.00369591 |
| GM21868 | <i>IM2</i>              | 6989.15  | 3509.61 | 0.00974006 |
| GM19911 | <i>IM23</i>             | 325.811  | 96.8803 | 0.00369591 |

|           |                        |         |          |            |
|-----------|------------------------|---------|----------|------------|
| GM14048   | <i>ImpE2</i>           | 0       | 5.72309  | 0.00369591 |
| GM19063   | <i>l(1)sc</i>          | 0       | 2.04759  | 0.00369591 |
| Mal-A7    | <i>Mal-A7</i>          | 115.653 | 66.3171  | 0.0264442  |
| GM19873   | <i>MFS14</i>           | 109.109 | 47.0949  | 0.00369591 |
| GM22138   | <i>Neu2</i>            | 2.41556 | 0        | 0.00369591 |
| GM23057   | <i>Ntf-2</i>           | 217.94  | 416.855  | 0.03358    |
| GM10877   | <i>Osi15</i>           | 0       | 9.91204  | 0.00369591 |
| GM10882   | <i>Osi18</i>           | 0       | 3.00331  | 0.00369591 |
| GM10883   | <i>Osi19</i>           | 0       | 5.0218   | 0.00369591 |
| GM10884   | <i>Osi20</i>           | 0       | 9.19281  | 0.00369591 |
| GM10867   | <i>Osi6</i>            | 0       | 3.0258   | 0.00369591 |
| GM10870   | <i>Osi9</i>            | 0       | 2.27975  | 0.00369591 |
| GM12960   | <i>Peritrophin-15a</i> | 5877.14 | 2900.75  | 0.00369591 |
| GM24370   | <i>PGRP-SB1</i>        | 322.452 | 91.6442  | 0.00369591 |
| GM23808   | <i>phu</i>             | 123.267 | 35.8208  | 0.00369591 |
| GM10803   | <i>RpIII8</i>          | 205.263 | 389.02   | 0.0237434  |
| GM15421   | <i>Scp2</i>            | 145.75  | 280.363  | 0.0067546  |
| GM21468   | <i>Ser8</i>            | 183.584 | 90.5475  | 0.00369591 |
| GM11667   | <i>SmB</i>             | 264.06  | 150.007  | 0.0181747  |
| GM25414   | <i>SNCF</i>            | 30.5046 | 0        | 0.00369591 |
| Sry-alpha | <i>Sry-alpha</i>       | 21.6102 | 1.79706  | 0.00369591 |
| GM22735   | <i>Tao</i>             | 94.7745 | 171.399  | 0.0290916  |
| GM14935   | <i>term</i>            | 15.7461 | 0.866257 | 0.0067546  |
| TotA1     | <i>TotA</i>            | 695.71  | 335.549  | 0.00369591 |
| TotA1     | <i>TotA</i>            | 702.268 | 331.185  | 0.00369591 |
| TotC      | <i>TotC</i>            | 190.273 | 63.1211  | 0.00369591 |
| GM10719   | <i>TwdlG</i>           | 0       | 3.35846  | 0.00369591 |
| GM10177   | <i>TwdlL</i>           | 0       | 3.15623  | 0.00369591 |
| GM10330   | <i>TwdlM</i>           | 0       | 11.3328  | 0.00369591 |
| GM10739   | <i>TwdlV</i>           | 0       | 2.06772  | 0.00369591 |
| GM13463   | <i>TwdlY</i>           | 0       | 3.27412  | 0.00369591 |

**Supplementary Table 2. Significantly differentially expressed genes and transcripts upon 0.7% OA exposure in *D. sechellia* with no annotated ortholog in *D. melanogaster* or non-mRNAs.**

| <i>D. sechellia</i> gene or transcript | Gene Type   | Predicted Function                 |
|----------------------------------------|-------------|------------------------------------|
| RF00001                                | rRNA gene   | ribosomal RNA                      |
| RF00002                                | rRNA gene   | ribosomal RNA                      |
| RF00017                                | rRNA gene   | ribosomal RNA                      |
| snoRNA:GM27480                         | snoRNA gene | small nucleolar RNA                |
| snoRNA:GM27503                         | snoRNA gene | small nucleolar RNA                |
| snoRNA:GM27504                         | snoRNA gene | small nucleolar RNA                |
| snoRNA:GM27570                         | snoRNA gene | small nucleolar RNA                |
| snRNA:U1:3                             | snRNA gene  | small nuclear RNA                  |
| snRNA:U1:7                             | snRNA gene  | small nuclear RNA                  |
| snRNA:U2:3                             | snRNA gene  | small nuclear RNA                  |
| snRNA:U2:4                             | snRNA gene  | small nuclear RNA                  |
| snRNA:U2:5                             | snRNA gene  | small nuclear RNA                  |
| 18SrRNA:GM27729                        | rRNA gene   | ribosomal RNA                      |
| 18SrRNA:GM27730                        | rRNA gene   | ribosomal RNA                      |
| 18SrRNA:GM27731                        | rRNA gene   | ribosomal RNA                      |
| 18SrRNA:GM27732                        | rRNA gene   | ribosomal RNA                      |
| 18SrRNA:GM27733                        | rRNA gene   | ribosomal RNA                      |
| 18SrRNA:GM27734                        | rRNA gene   | ribosomal RNA                      |
| GM13041                                | NO ORTHOLOG | none                               |
| GM16569                                | NO ORTHOLOG | structural constituent of ribosome |
| GM18057                                | NO ORTHOLOG | serine-type endopeptidase activity |
| GM19428                                | NO ORTHOLOG | none                               |
| GM20514                                | NO ORTHOLOG | none                               |
| GM22086                                | NO ORTHOLOG | none                               |
| GM22087                                | NO ORTHOLOG | none                               |
| GM22462                                | NO ORTHOLOG | none                               |
| GM22463                                | NO ORTHOLOG | none                               |
| GM24426                                | NO ORTHOLOG | none                               |

**Supplementary Table 3. GO term enrichment of significantly upregulated genes.**

| GO Term                                        | GO ID      | Ontology           | Fold Enrichment | <i>P</i> -value |
|------------------------------------------------|------------|--------------------|-----------------|-----------------|
| body morphogenesis                             | GO:0010171 | biological process | 58.51           | 2.34E-03        |
| chitin-based cuticle development               | GO:0040003 | biological process | 16.54           | 7.37E-05        |
| cuticle development                            | GO:0042335 | biological process | 11.97           | 8.63E-04        |
| structural constituent of chitin-based cuticle | GO:0005214 | molecular function | 23.4            | 2.15E-06        |
| structural constituent of cuticle              | GO:0042302 | molecular function | 22.25           | 3.18E-06        |
| structural molecule activity                   | GO:0005198 | molecular function | 7.34            | 3.41E-03        |
| proteinaceous extracellular matrix             | GO:0005578 | cellular component | 29.04           | 6.38E-04        |
| extracellular matrix                           | GO:0031012 | cellular component | 15.49           | 2.91E-05        |

**Supplementary Table 4. GO term enrichment of significantly downregulated genes.**

| <b>GO Term</b>                              | <b>GO ID</b> | <b>Ontology</b>    | <b>Fold Enrichment</b> | <b>P-value</b> |
|---------------------------------------------|--------------|--------------------|------------------------|----------------|
| antibacterial humoral response              | GO:0019731   | biological process | 70.28                  | 3.96E-08       |
| defense response to Gram-positive bacterium | GO:0050830   | biological process | 47.02                  | 2.99E-08       |
| antimicrobial humoral response              | GO:0019730   | biological process | 30.67                  | 1.19E-05       |
| humoral immune response                     | GO:0006959   | biological process | 28.54                  | 1.13E-07       |
| response to bacterium                       | GO:0009617   | biological process | 14.57                  | 1.47E-08       |
| defense response to other organism          | GO:0098542   | biological process | 12.68                  | 8.09E-08       |
| immune response                             | GO:0006955   | biological process | 12.23                  | 2.83E-05       |
| response to external biotic stimulus        | GO:0043207   | biological process | 12.16                  | 5.29E-10       |
| response to other organism                  | GO:0051707   | biological process | 12.16                  | 5.29E-10       |
| response to biotic stimulus                 | GO:0009607   | biological process | 12.16                  | 5.29E-10       |
| defense response to bacterium               | GO:0042742   | biological process | 11.72                  | 2.40E-04       |
| defense response                            | GO:0006952   | biological process | 10.66                  | 2.17E-08       |
| immune system process                       | GO:0002376   | biological process | 7.7                    | 2.01E-03       |
| response to external stimulus               | GO:0009605   | biological process | 4.47                   | 3.67E-04       |
| response to stress                          | GO:0006950   | biological process | 4.18                   | 6.08E-05       |
| multi-organism process                      | GO:0051704   | biological process | 3.36                   | 2.14E-03       |
| chorion                                     | GO:0042600   | cellular component | 30.89                  | 5.26E-04       |
| external encapsulating structure            | GO:0030312   | cellular component | 28.02                  | 8.46E-04       |
| extracellular space                         | GO:0005615   | cellular component | 7.26                   | 1.03E-06       |
| extracellular region                        | GO:0005576   | cellular component | 5.5                    | 8.98E-10       |
| extracellular region part                   | GO:0044421   | cellular component | 4.96                   | 1.57E-04       |
| intracellular part                          | GO:0044424   | cellular component | 0.34                   | 5.20E-03       |
| intracellular                               | GO:0005622   | cellular component | 0.33                   | 3.68E-03       |
| intracellular organelle                     | GO:0043229   | cellular component | 0.31                   | 3.74E-02       |
| organelle                                   | GO:0043226   | cellular component | 0.3                    | 2.74E-02       |
| membrane-bounded organelle                  | GO:0043227   | cellular component | 0.24                   | 3.04E-02       |
